# Supplementary material for: Reproductive phasiRNAs regulate reprogramming of gene expression and meiotic progression in rice
Source: PubMed Central journal article supplement (PMC7695705; doi:10.1038/s41467-020-19922-3), 2020-11-27
Supplement: 41467_2020_19922_MOESM3_ESM.pdf [file 41467_2020_19922_MOESM3_ESM.pdf]

## **Descriptions of Additional Supplementary Files**

### **Supplementary Data 1**

**Description:** A list of the sequencing data performed in this study.

### **Supplementary Data 2**

**Description:** Information of reproductive phasiRNAs.

### **Supplementary Data 3**

**Description:** Information of the target genes of reproductive phasiRNAs.

### **Supplementary Data 4**

**Description:** Information of other target genes which were filtered out.

### **Supplementary Data 5**

**Description:** Enriched GO terms of reproductive phasiRNA targeted genes.

### **Supplementary Data 6**

**Description:** Primers used in this study.
